# Supplementary material for: Understanding tree growth responses after partial cuttings: A new approach
Source: PLOS journal article supplement (doi:10.1371/journal.pone.0172653), 2017-02-21

**S2 Appendix.** Inter-annual variability in cumulative radial growth for the four Schnute curves. The continuous lines show the mean values and the discontinuous lines indicate the lower and upper 95% confidence intervals.

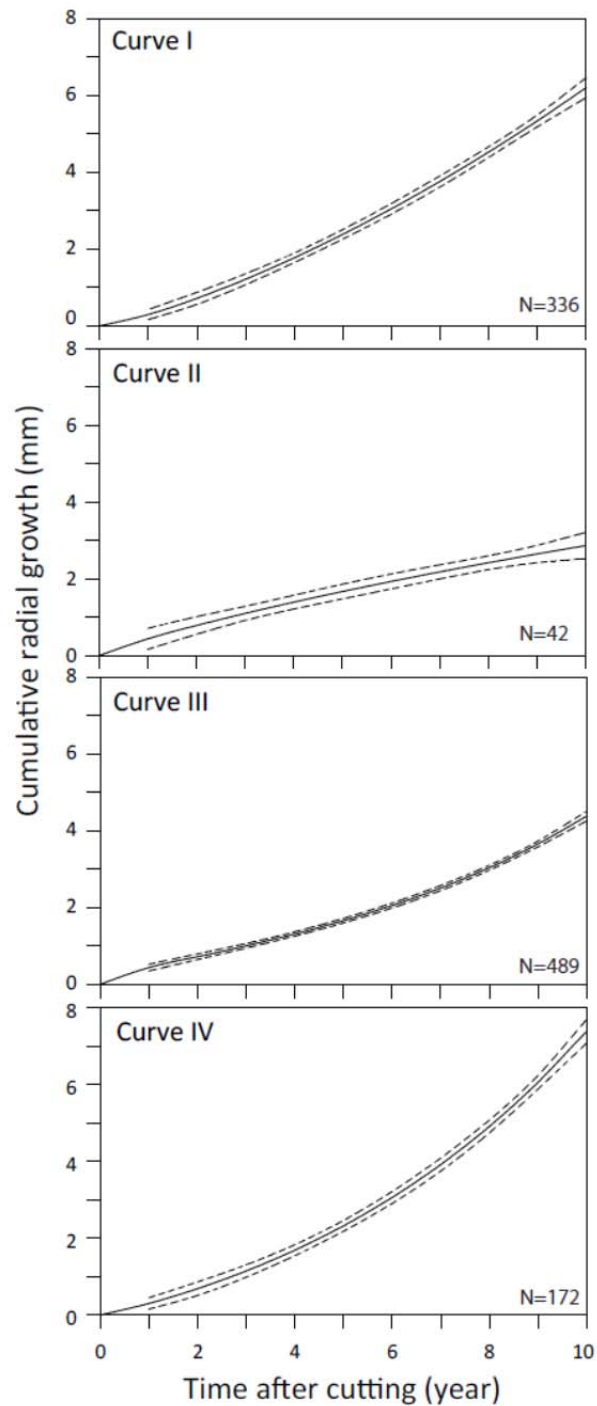

Supplement: S2 (10.1371/journal.pone.0172653.s002) [file journal.pone.0172653.s002]
